# Supplementary material for: Near-infrared broadly emissive AgInSe2/ZnS quantum dots for biomedical optical imaging
Source: Royal Society of Chemistry journal article supplement (doi:10.1039/c4tc01147c), 2014-06-27
Supplement: c4tc01147c1.pdf [file c4tc01147c1.pdf]

## Electronic Supplementary Information (ESI)

### Near-infrared broadly emissive AgInSe<sub>2</sub>/ZnS quantum dots for biomedical optical imaging

Dawei Deng,<sup>\*ab</sup> Lingzhi Qu,<sup>a</sup> and Yueqing Gu<sup>\*a</sup>

<sup>a</sup> School of Life Science and Technology, and State Key Laboratory of Natural Medicines, China Pharmaceutical University, Nanjing 210009, China

<sup>b</sup> Chemical Engineering Department, University of Michigan, Ann Arbor, Michigan 48109, United States

\* Corresponding author. Fax: +86 25 83271046

E-mail: dengdawei@cpu.edu.cn or dengd@umich.edu (D. Deng),  
guyueqingsubmission@hotmail.com (Y. Gu)

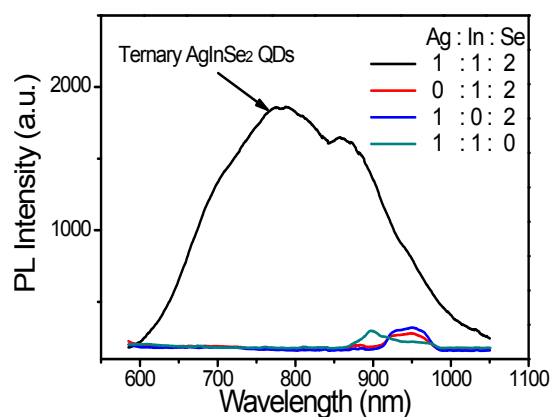

**Fig. S1** PL spectra of the dispersions prepared with different Ag/In/Se feed ratios, in which Se powder dissolved in the mixture of oleylamine (OLA) and 1-dodecanethiol (DDT) was used as Se source.

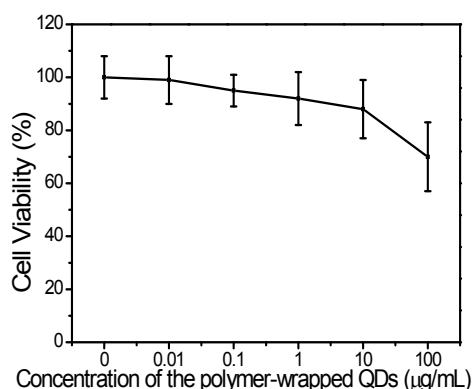

**Fig. S2** Cell viability of human embryonic lung fibroblast (HELFL) cells incubated with different concentrations of amphiphilic polymer-wrapped QDs ([QDs]=0, 0.01, 0.1, 1, 10, and 100 µg/mL) for 48 h. Here, MTT assay was conducted to assess preliminarily the cytotoxicity of QDs. The OD was measured with a Microplate Reader (Biorad).

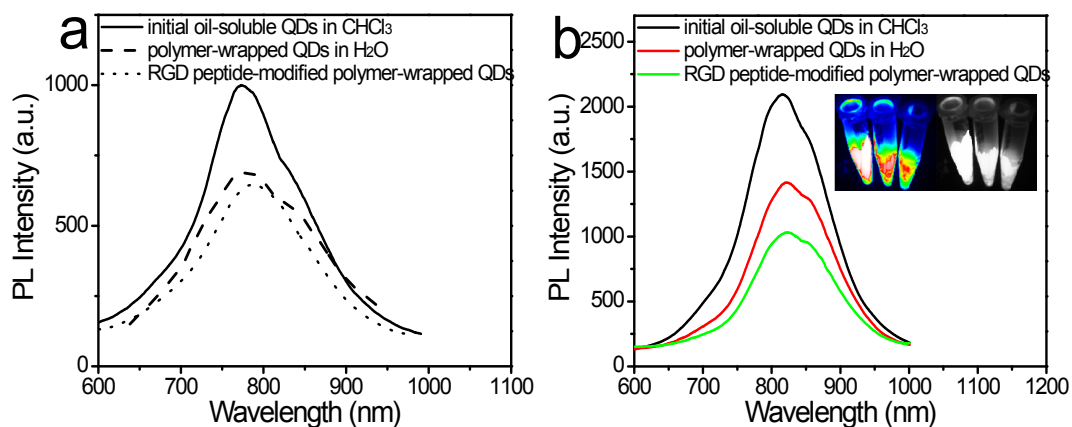

**Fig. S3** (a) and (b) PL spectra of initial oil-soluble AlSe/ZnS QDs, amphiphilic polymer-wrapped QDs and RGD-modification amphiphilic polymer-QDs with various PL emission peaks.
